# Supplementary material for: Lactobacillus rhamnosus GG Derived Extracellular Vesicles Modulate Gut Microbiota and Attenuate Inflammatory in DSS-Induced Colitis Mice
Source: MDPI journal article supplement (doi:10.3390/nu13103319), 2021-09-23

# ***Lactobacillus rhamnosus* GG derived extracellular vesicles modulate gut microbiota and attenuate inflammatory in DSS-induced colitis mice**

**Lingjun Tong<sup>1</sup>, Xinyi Zhang<sup>1</sup>, Haining Hao<sup>1</sup>, Qiqi Liu<sup>1</sup>, Zihan Zhou<sup>1</sup>, Xi Liang<sup>1</sup>, Tongjie Liu<sup>1</sup>, Pimin Gong<sup>1</sup>, Lanwei Zhang<sup>1</sup>, Zhengyuan Zhai<sup>2</sup>, Yanling Hao<sup>2,3</sup>, Huaxi Yi<sup>1\*</sup>**

<sup>1</sup> College of Food Science and Engineering, Ocean University of China, 5 Yushan Road, Qingdao 266003, P. R. China

<sup>2</sup> Key Laboratory of Functional Dairy, Co-constructed by Ministry of Education and Beijing Municipality, College of Food Science and Nutritional Engineering, China Agricultural University, Beijing, China

<sup>3</sup> College of Food Science and Nutritional Engineering, China Agricultural University, 17 Qing Hua East Road, Hai Dian District, Beijing, 100083, China

\*Correspondence: yihx@ouc.edu.cn (H.X. Y.); Tel.: +86-0532-8203-2162 (H.X.Y.)

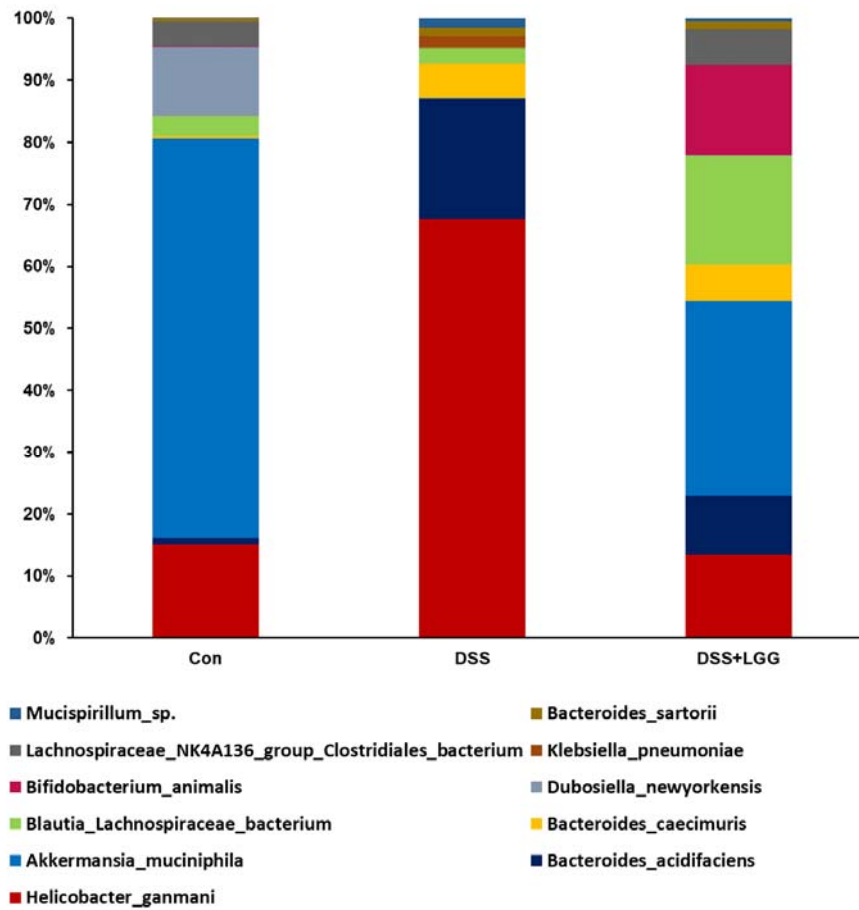

Fig. S1 Bar plots of the taxonomic composition at the species level.

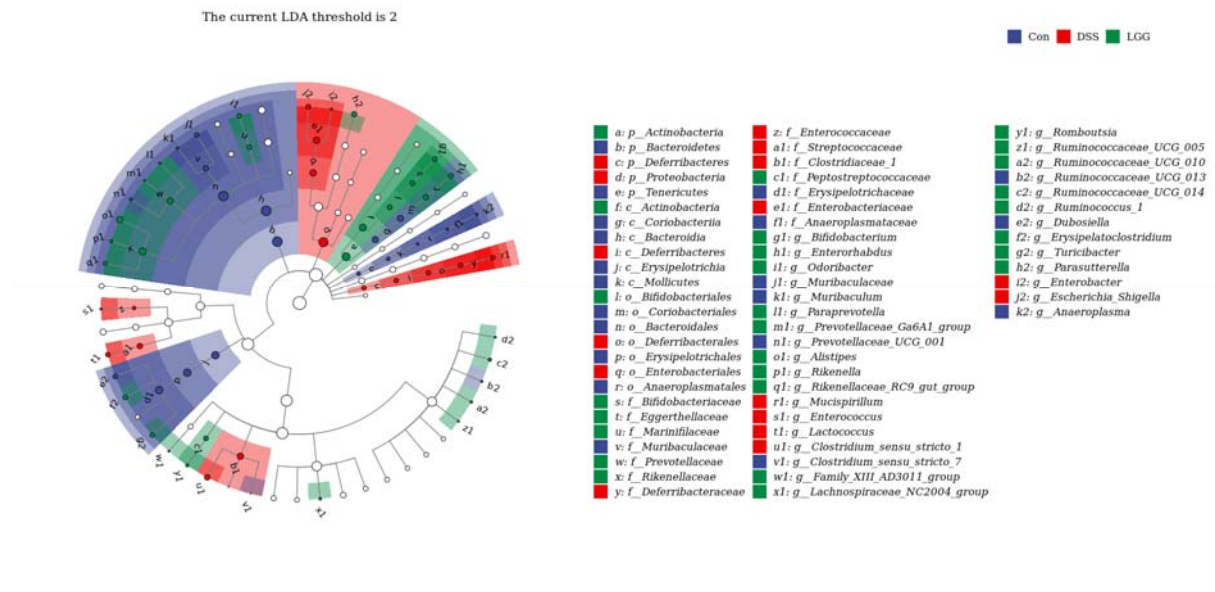

Fig. S2 Bacterial taxa identified as differentially abundant between groups according to linear discriminant analysis effect size (LEfSe).

Table S1 The mice dietary ingredients and nutritional value.

| Numbers                   | Component               |
|---------------------------|-------------------------|
| 1                         | corn                    |
| 2                         | soybean meal            |
| 3                         | flour                   |
| 4                         | wheat middlings         |
| 5                         | fish meal               |
| 6                         | plant oil               |
| 7                         | dicalcium phosphate     |
| 8                         | limestone               |
| 9                         | salt                    |
| 10                        | vitamins                |
| 11                        | mineral elements        |
| The energy contribution   | Nutritional value (%)   |
| Protein                   | 23.07%                  |
| Fat                       | 11.85%                  |
| Carbohydrate              | 65.08%                  |
| Total energy              | 3.40kcal/g              |
| Vitamin                   | Nutritional value (/kg) |
| Vitamin A (IU)            | 7800.00                 |
| Vitamin D(IU)             | 1200.00                 |
| Vitamin E (mg)            | 67.00                   |
| Vitamin K (mg)            | 5.00                    |
| Vitamin B1, 2, 6, 12 (mg) | 35.02                   |
| Nicotinic acid (mg)       | 55.00                   |
| Biotin (mg)               | 0.20                    |
| Choline (mg)              | 1250.00                 |
| Folic acid (mg)           | 6.60                    |
| Pantothenic acid (mg)     | 22.00                   |
| Amino acid (g)            | 83.90                   |
| Mineral (g)               | 13.64                   |

Mouse feed was purchased BEIJING KEAO XIELI FEED CO., LTD. More detail information was supported by <http://en.keaoxili.com/product/144.html>.

Table S2 Primer sequences for qRT-PCR analysis.

| Gene          | Forward Primer Sequence  | Reverse Primer Sequence  |
|---------------|--------------------------|--------------------------|
| TNF- $\alpha$ | GCGACGTGGAAGTGGCAGAAG    | GCCACAAGCAGGAATGAGAAGAGG |
| IL-1 $\beta$  | TCGCAGCAGCACATCAACAAGAG  | TGCTCATGTCCTCATCCTGGAAGG |
| IL-2          | GCAGCTCGCATCCTGTGTAC     | CTGCTGTGCTTCCGCTGTAGAG   |
| IL-6          | ACTTCCATCCAGTTGCCTTCTTGG | TTAAGCCTCCGACTTGTGAAGTGG |
| TLR-4         | ACAAGGCATGGCATGGCTTACAC  | TGTCTCCACAGCCACCAGATTCTC |
| MyD88         | GCTAGAGCTGCTGGCCTTGTAG   | TCTCGGACTCCTGGTTCTGCTG   |
| GAPDH         | GGTTGTCTCCTGCGACTTCA     | TGGTCCAGGGTTTCTTACTCC    |

Table S3 Protein levels of IL-1 $\beta$ , IL-6, and TNF- $\alpha$  in serum were determined by ELISA. (n=3)

| Groups    | TNF- $\alpha$ (pg/mL) | IL-6 (pg/mL)      | IL- $\beta$ (pg/mL) |
|-----------|-----------------------|-------------------|---------------------|
| Control   | 67.67 $\pm$ 1.68**    | 19.07 $\pm$ 1.36* | 18.23 $\pm$ 0.78**  |
| DSS       | 71.71 $\pm$ 2.05      | 22.05 $\pm$ 2.16  | 20.43 $\pm$ 1.96    |
| DSS+L-EVs | 60.52 $\pm$ 2.74**    | 20.29 $\pm$ 1.28  | 18.96 $\pm$ 1.41    |

\* $p < 0.05$ , \*\* $p < 0.01$  vs. DSS group.

## Normality of distribution of Data:

### For Table S1: The verification of normal distribution.

|                                     | -6d    | -4d    | -2d    | 0d     | 2d     | 4d     | 6d     | 8d     |
|-------------------------------------|--------|--------|--------|--------|--------|--------|--------|--------|
| D'Agostino & Pearson test           |        |        |        |        |        |        |        |        |
| K2                                  | 2.393  | 0.0881 | 1.380  | 0.6798 | 5.820  | 0.4083 | 1.087  | 5.393  |
| P value                             | 0.3023 | 0.956  | 0.5016 | 0.7118 | 0.0545 | 0.8153 | 0.5808 | 0.0675 |
| Passed normality test (alpha=0.05)? | Yes    |
| P value summary                     | ns     |

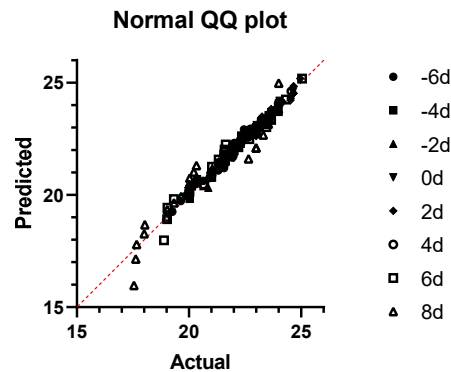

### For Table S2: The verification of normal distribution.

|                                     | spleen index | liver index | colon length |
|-------------------------------------|--------------|-------------|--------------|
| D'Agostino & Pearson test           |              |             |              |
| K2                                  | 1.017        | 0.1099      | 0.2163       |
| P value                             | 0.6013       | 0.9465      | 0.8975       |
| Passed normality test (alpha=0.05)? | Yes          | Yes         | Yes          |
| P value summary                     | ns           | ns          | ns           |

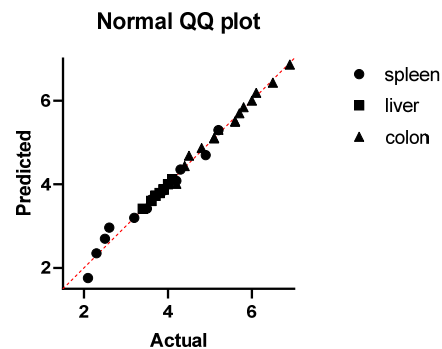

### For Table S3: The verification of normal distribution.

|                                     | IL6    | IL-1b  | IL-2   | TNF-a  | TLR4   | Myd88  |
|-------------------------------------|--------|--------|--------|--------|--------|--------|
| D'Agostino & Pearson test           |        |        |        |        |        |        |
| K2                                  | 0.5954 | 2.960  | 3.136  | 2.782  | 3.692  | 0.5582 |
| P value                             | 0.7425 | 0.2277 | 0.2085 | 0.2488 | 0.1579 | 0.7565 |
| Passed normality test (alpha=0.05)? | Yes    | Yes    | Yes    | Yes    | Yes    | Yes    |
| P value summary                     | ns     | ns     | ns     | ns     | ns     | ns     |

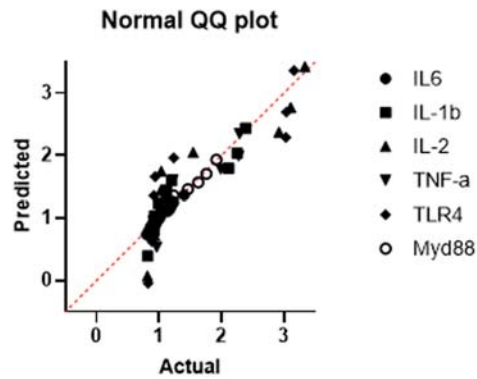

**For Table S4: The verification of normal distribution.**

|                                     | p-p65/p65 | ASC    | NLRP3  |
|-------------------------------------|-----------|--------|--------|
| D'Agostino & Pearson test           |           |        |        |
| K2                                  | 1.739     | 2.963  | 0.4121 |
| P value                             | 0.4191    | 0.2273 | 0.8138 |
| Passed normality test (alpha=0.05)? | Yes       | Yes    | Yes    |
| P value summary                     | ns        | ns     | ns     |

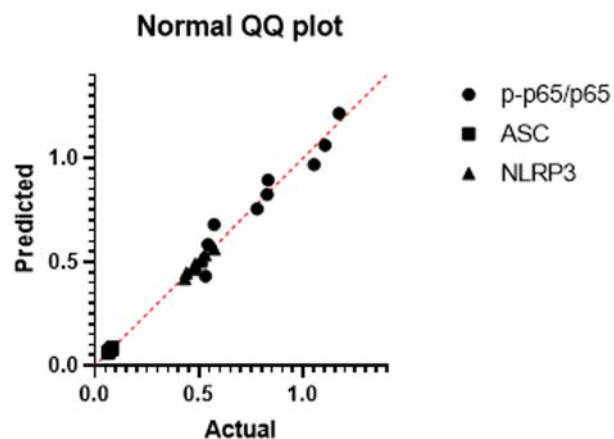

**For Table S5: The verification of normal distribution.**

|                                     | Chao1  | Shannon | Observed_species | Faith_pd | Simpson | Pielou_e |
|-------------------------------------|--------|---------|------------------|----------|---------|----------|
| D'Agostino & Pearson test           |        |         |                  |          |         |          |
| K2                                  | 1.649  | 0.7036  | 1.709            | 0.3403   | 4.437   | 2.216    |
| P value                             | 0.4385 | 0.7034  | 0.4255           | 0.8436   | 0.1088  | 0.3302   |
| Passed normality test (alpha=0.05)? | Yes    | Yes     | Yes              | Yes      | Yes     | Yes      |
| P value summary                     | ns     | ns      | ns               | ns       | ns      | ns       |

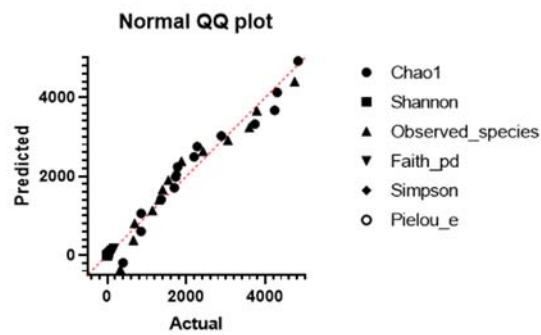

**For Table S6: The verification of normal distribution.**

|                                     | Lachnospiraceae | Ruminococcaceae | Lactobacillaceae | Clostridiaceae_1 | Clostridiales_vadinBB60_group |
|-------------------------------------|-----------------|-----------------|------------------|------------------|-------------------------------|
| D'Agostino & Pearson test           |                 |                 |                  |                  |                               |
| K2                                  | 3.836           | 2.915           | 8.976            | 3.244            | 19.86                         |
| P value                             | 0.1469          | 0.2328          | 0.0112           | 0.1975           | <0.0001                       |
| Passed normality test (alpha=0.05)? | Yes             | Yes             | No               | Yes              | No                            |
| P value summary                     | ns              | ns              | *                | ns               | ****                          |

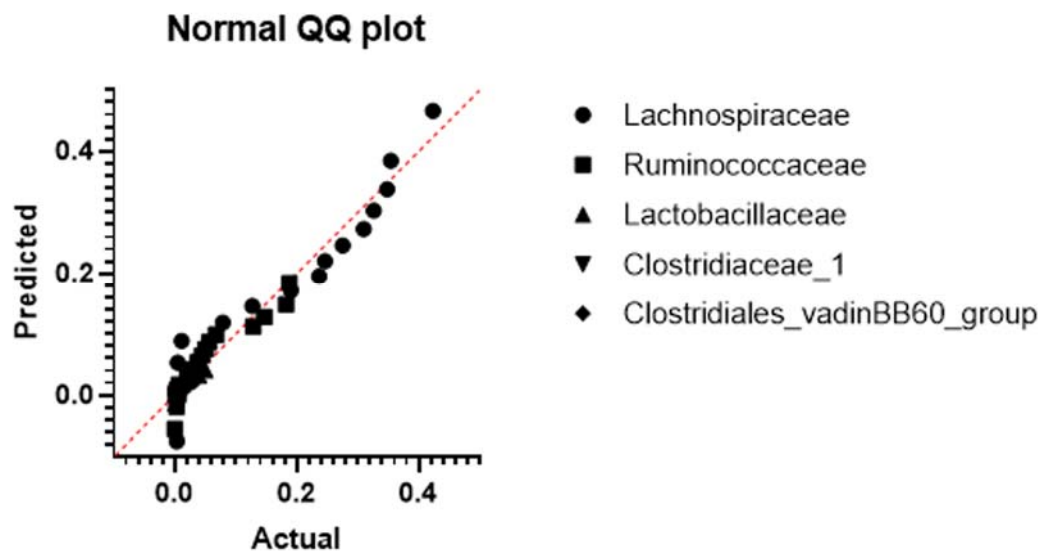



**For Table S7: The verification of normal distribution.**

|                                        | Lachnospiraceae<br>_NK4A136_group | Rumini<br>clostridium_9 | Lacto<br>bacillus_sensu_stricto_1 | Clostridium<br>_vadinBB60_group | Clostridiales | Faecali<br>baculum |
|----------------------------------------|-----------------------------------|-------------------------|-----------------------------------|---------------------------------|---------------|--------------------|
| D'Agostino & Pearson test              |                                   |                         |                                   |                                 |               |                    |
| K2                                     |                                   | 4.114                   | 29.91                             | 4.522                           | 3.139         | 17.73              |
|                                        |                                   |                         |                                   | 0.104                           |               | 11.18              |
| P value                                |                                   | 0.1278                  | <0.0001                           | 2                               | 0.2081        | 0.0001             |
| Passed normality test<br>(alpha=0.05)? |                                   | Yes                     | No                                | Yes                             | Yes           | No                 |
| P value summary                        |                                   | ns                      | ****                              | ns                              | ns            | ***                |

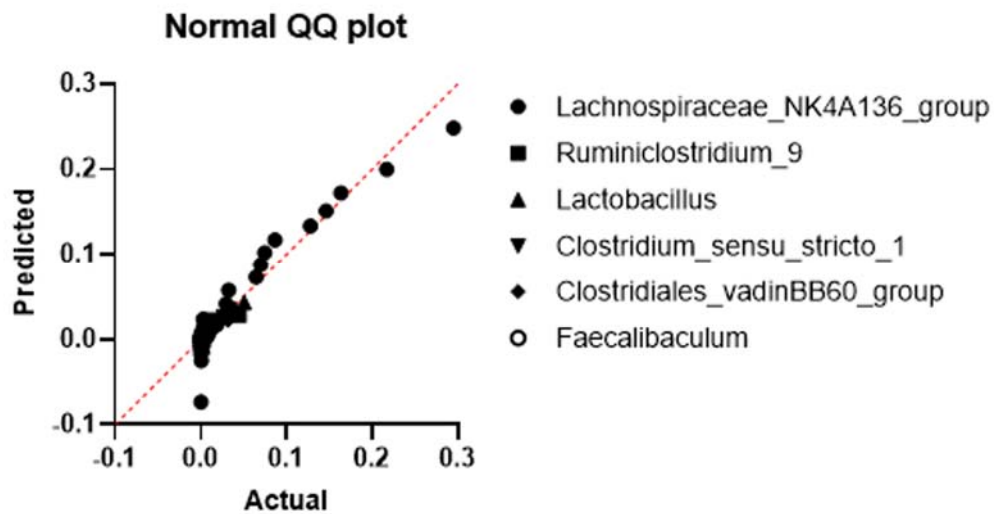

Supplement: s1 [file s1]
